# Supplementary material for: Preliminary Evaluation of Preoperative Optic Nerve Sheath Diameter and CT Mass Effect in Relation to Pre-Excision Invasive Intracranial Pressure During Intracranial Tumor Surgery
Source: MDPI journal article supplement (doi:10.3390/jcm15103807), 2026-05-15

## Supplementary Materials

**Supplementary Table S1.** Exploratory binary threshold model performance

| Threshold          | Model          | Apparent AUC | LOOCV AUC | LOOCV Brier |
|--------------------|----------------|--------------|-----------|-------------|
| ICP >20 mmHg       | ONSD           | 0.716        | 0.594     | 0.124       |
| ICP >20 mmHg       | Gordon-Firing  | 0.667        | 0.590     | 0.122       |
| ICP >20 mmHg       | Combined model | 0.791        | 0.684     | 0.128       |
| ICP >22 mmHg       | ONSD           | 0.647        | 0.500     | 0.172       |
| ICP >22 mmHg       | Gordon-Firing  | 0.653        | 0.596     | 0.167       |
| ICP >22 mmHg       | Combined model | 0.707        | 0.596     | 0.174       |
| ICP $\geq$ 25 mmHg | ONSD           | 0.631        | 0.523     | 0.203       |
| ICP $\geq$ 25 mmHg | Gordon-Firing  | 0.679        | 0.624     | 0.199       |
| ICP $\geq$ 25 mmHg | Combined model | 0.736        | 0.654     | 0.201       |

These analyses are exploratory because the cohort is highly enriched for elevated ICP, especially at lower thresholds.

**Supplementary Figure S1.** Exploratory ROC curves across binary ICP thresholds. AUC: area under the curve; ICP: intracranial pressure; ONSD: optic nerve sheath diameter; ROC: receiver operating characteristic.

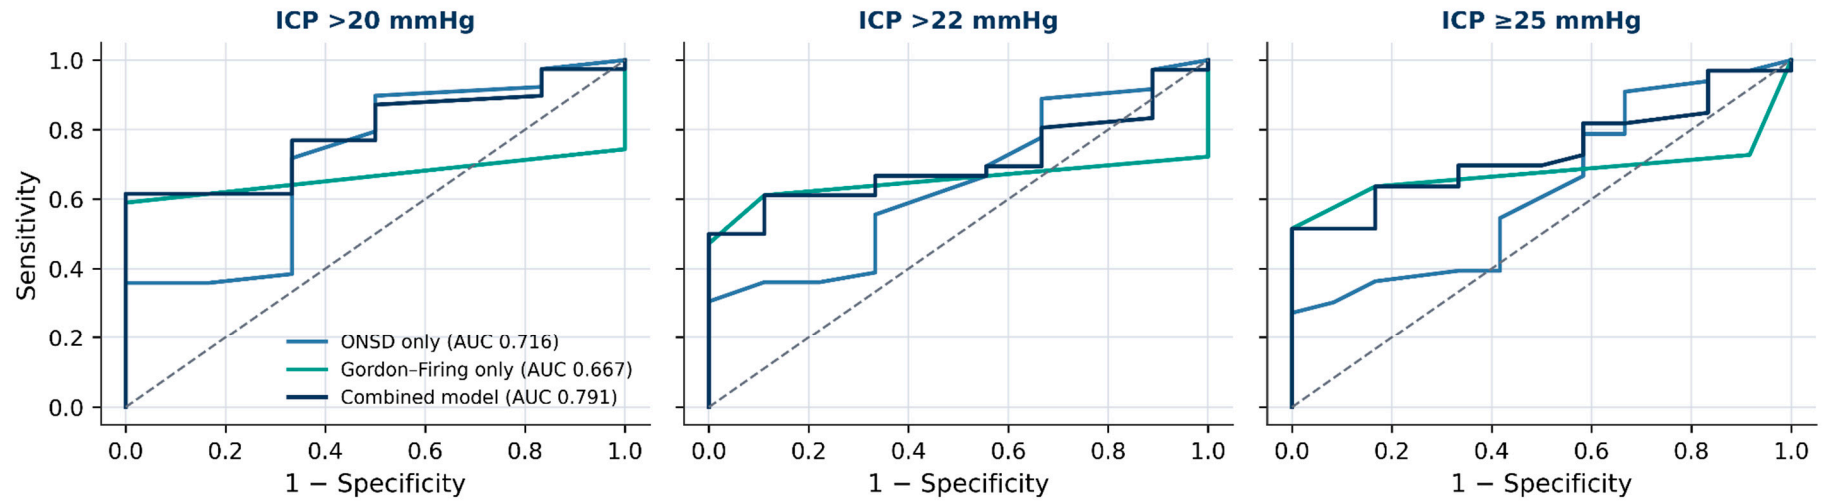

Supplement: s1 [file jcm-4298269-supplementary.pdf › jcm-4298269-supplementary.pdf]
